# Supplementary material for: Impacts of land use change and elevated CO 2 on the interannual variations and seasonal cycles of gross primary productivity in China
Source: Copernicus journal article supplement (doi:10.5194/esd-11-235-2020), 2020-03-09
Supplement: Supplementary file 1 [file esd-11-235-2020-supplement.pdf]

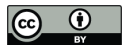

## *Supplement of*

# **Impacts of land use change and elevated CO<sub>2</sub> on the interannual variations and seasonal cycles of gross primary productivity in China**

**Binghao Jia et al.**

*Correspondence to:* Binghao Jia ([bhjia@mail.iap.ac.cn](mailto:bhjia@mail.iap.ac.cn))

The copyright of individual parts of the supplement might differ from the CC BY 4.0 License.

## S1 Models and data

In this study, we used twelve terrestrial biosphere models (TBMs) that participated in the Multi-scale Synthesis and Terrestrial Model Intercomparison Project (MsTMIP) (Huntzinger et al., 2013; Wei et al., 2014a, 2014b) to investigate the effects of climate change, land use and land cover change (LULCC), and rising CO<sub>2</sub> concentration on the temporal changes in GPP. These models are Community Land Model version 4 (CLM4; Shi et al., 2011; Mao et al., 2012), CLM4 with Variable Infiltration Capacity Runoff Parameterization (CLM4VIC; Lei et al., 2014), Dynamic Land Ecosystem Model (DLEM; Tian et al., 2011, 2012), Global Terrestrial Ecosystem Carbon model (GTEC; Ricciuto et al., 2011), Integrated Science Assessment Model (ISAM; Jain et al., 2013), Lund-Potsdam-Jena Dynamic Global Vegetation Model, Swiss Federal Research Institute WSL modification (LPJ-wsl; Sitch et al., 2003), Organizing Carbon and Hydrology in Dynamic Ecosystems (ORCHIDEE-LSCE; Krinner et al., 2005), Simple Biosphere version 3 by Jet Propulsion Laboratory (SiB3-JPL; Baker et al., 2008), SiB3 with Carnegie-Ames-Stanford Approach (SiBCASA; Schaefer et al., 2008), Terrestrial Ecosystem Model version 6 (TEM6; Hayes et al., 2011), Vegetation Global Atmosphere and Soil version 2.1 (VEGAS2.1; Zeng et al., 2005), and Vegetation Integrative Simulator for Trace gases (VISIT; Ito and Inatomi, 2012), respectively. They were all forced by the same climate drivers, LULCC, and CO<sub>2</sub> data. The climate forcing data set was generated by combining the Climate Research Unit (CRU) data and the National Center for Environmental Prediction and National Center for Atmospheric Research (NCEP/NCAR) Reanalysis product (hereafter CRU-NCEP). Time-series data for atmospheric CO<sub>2</sub> concentration derived from observations were applied to SG3, and other simulations used constant CO<sub>2</sub>. A merged product derived from a static satellite-based land cover product, SYNergetic land cover MAP (SYNMAP) (Jung et al., 2006) and the time-varying land use harmonization version 1 (LUH1) data (Hurtt et al., 2011) from the fifth Assessment Report of the Intergovernmental Panel on Climate Change (IPCC) were used to describe historical LULCC.

## S2 Analysis methods

The nonparametric Mann-Kendall method was used to determine the statistical significance of trends in Chinese and regional GPP (area-weighted), where the Sen median slope (Sen, 1968) was considered as the trend value in this paper. Trend analysis was based on annual values averaged from monthly values. The first step was to test for statistical significance of trends by computing the Mann-Kendall statistic  $S$ . Each data value was compared with all subsequent data values as follows:

$$S = \sum_{k=1}^{n-1} \sum_{j=k+1}^n \text{sgn}(GPP_j - GPP_k), \quad (S1)$$

$$\text{sgn}(GPP_j - GPP_k) = \begin{cases} 1, GPP_j > GPP_k \\ 0, GPP_j = GPP_k \\ -1, GPP_j < GPP_k \end{cases}, \quad (S2)$$

where  $n$  is the length of the record for a given grid cell or region. The variance of  $S$  (Eq. (S3)) was then calculated to test for the presence of a statistically significant trend using the Z-value (Eq. (S4)):

$$\text{var}(S) = \frac{1}{18} [n(n-1)(2n+5) - \sum_{p=1}^q t_p(t_p-1)(2t_p+5)], \quad (S3)$$

$$Z = \begin{cases} \frac{S-1}{\sqrt{\text{var}(S)}}, S > 0 \\ 0, S = 0 \\ \frac{S+1}{\sqrt{\text{var}(S)}}, S < 0 \end{cases}. \quad (S4)$$

where  $q$  is the number of tied groups and  $t_p$  is the number of data values in the  $p^{\text{th}}$  group. The statistic  $Z$  was compared with a tolerable probability (the default significance level was set to 0.05 in this study). If a linear trend was statistically significant, then the change per unit time was estimated using a simple nonparametric procedure developed by Sen (1968):

$$b_{\text{sen}} = \text{Median} \left( \frac{GPP_j - GPP_k}{j - k} \right), j > k. \quad (S5)$$

If there were  $n$  values of  $GPP_j$  in the time series, as many as  $n(n-1)/2$  slope estimates could be obtained, and  $b_{\text{sen}}$  was taken as their median.

Each region's relative contribution to the interannual variation (IAV) and seasonal cycle amplitude (SCA) of China's GPP was also calculated based on the method proposed by Ahlström *et al.* (2015) and Chen *et al.* (2017). The regional contribution  $R_j$  ( $j=1,2, \dots,9$ ) to the IAV of China's GPP was calculated using the following equations:

$$f_i = \frac{\sum_t \frac{A_i x_{i,t} |X_t|}{X_t}}{\sum_t |X_t|}, \quad (S6)$$

$$X_t = \sum_i A_i x_{i,t}, \quad (S7)$$

where  $x_{i,t}$  is the GPP anomaly for region  $i$  in year  $t$ ,  $A_i$  is the area of region  $i$ , and  $X_t$  is the area-weighted total GPP anomaly in the whole of China in year  $t$ . By this definition,  $f_i$  is the average relative area-weighted anomaly  $A_i x_{i,t} / X_t$  for region  $i$ , weighted by the absolute regional area-weighted anomaly  $|X_t|$ .  $f_i$  ranges from -1 to 1. Higher positive  $f_i$  indicates that IAV in the region varies in phase with integral IAV and makes a larger contribution towards the IAV of China's GPP, whereas a smaller or negative  $f_i$  represents the opposite. In the same way, the regional contribution to the seasonality of China's GPP was calculated using Eq. (S6), in which  $x_{i,t}$  is the monthly GPP departure from the annual mean (seasonal anomaly) for region  $i$  in month  $t$  and  $X_t$  is the area-weighted total seasonal GPP anomaly for all China in month  $t$ .

## Figures

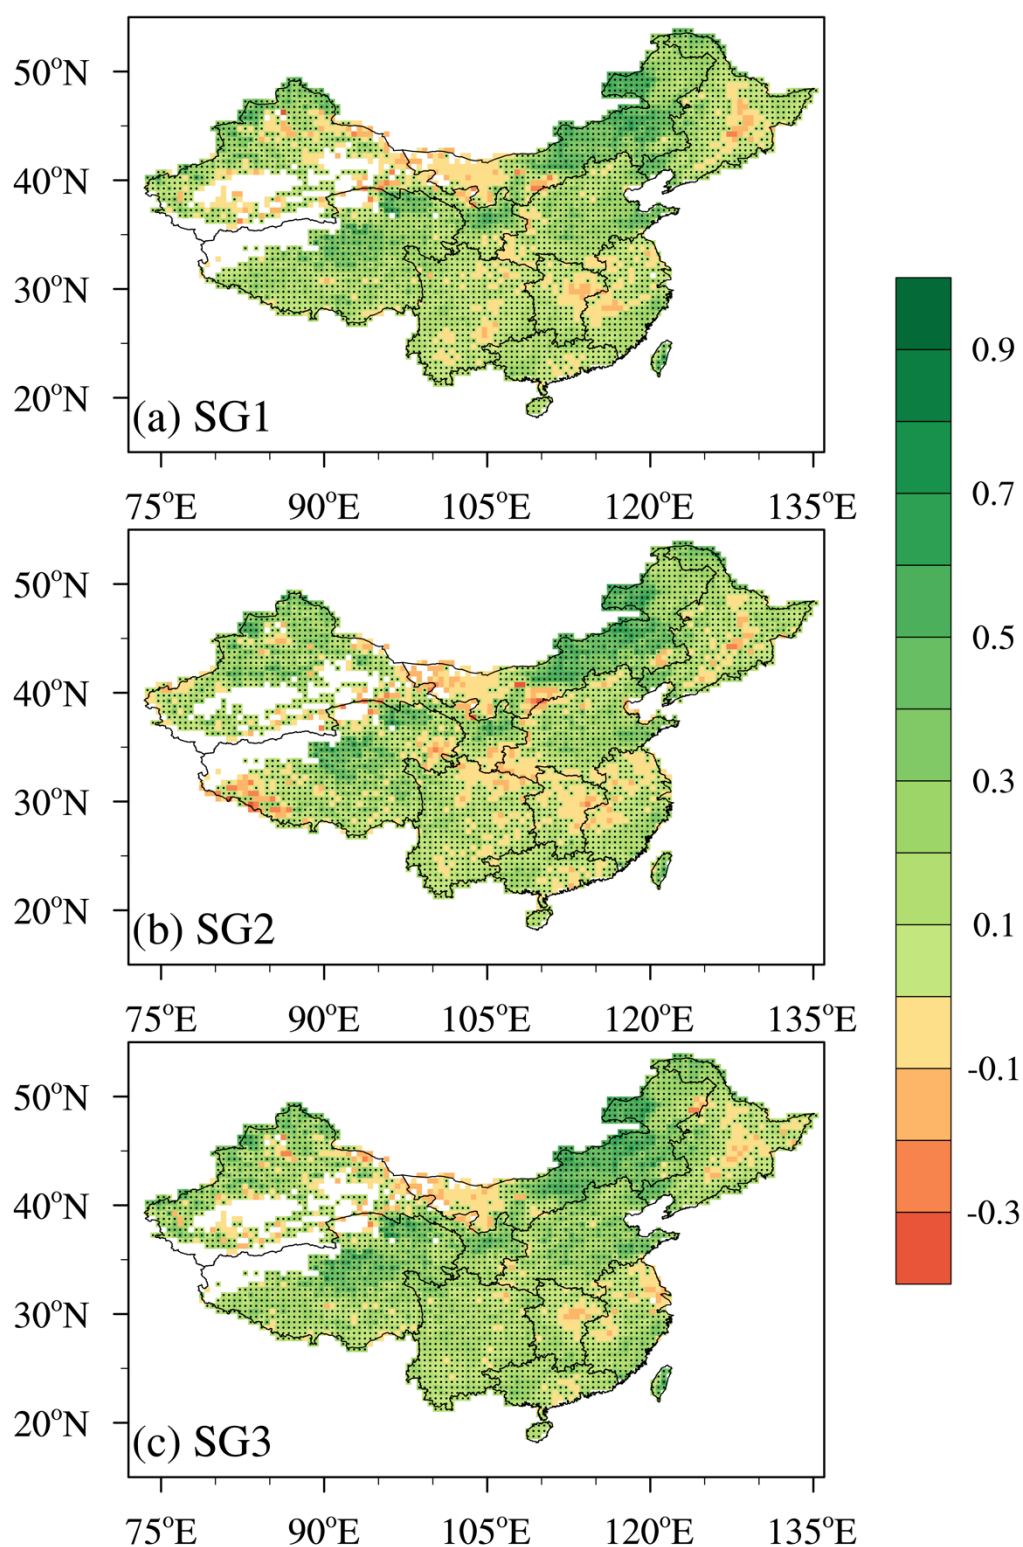

**Figure S1.** Spatial patterns of temporal correlation coefficients between annual GPP from MTE and that from ensemble mean of MsTMIP simulations for the period of 1982–2010, including: (a) SG1, (b) SG2, and (c) SG3. Stippling highlights regions with significant correlations ( $p < 0.05$ ).

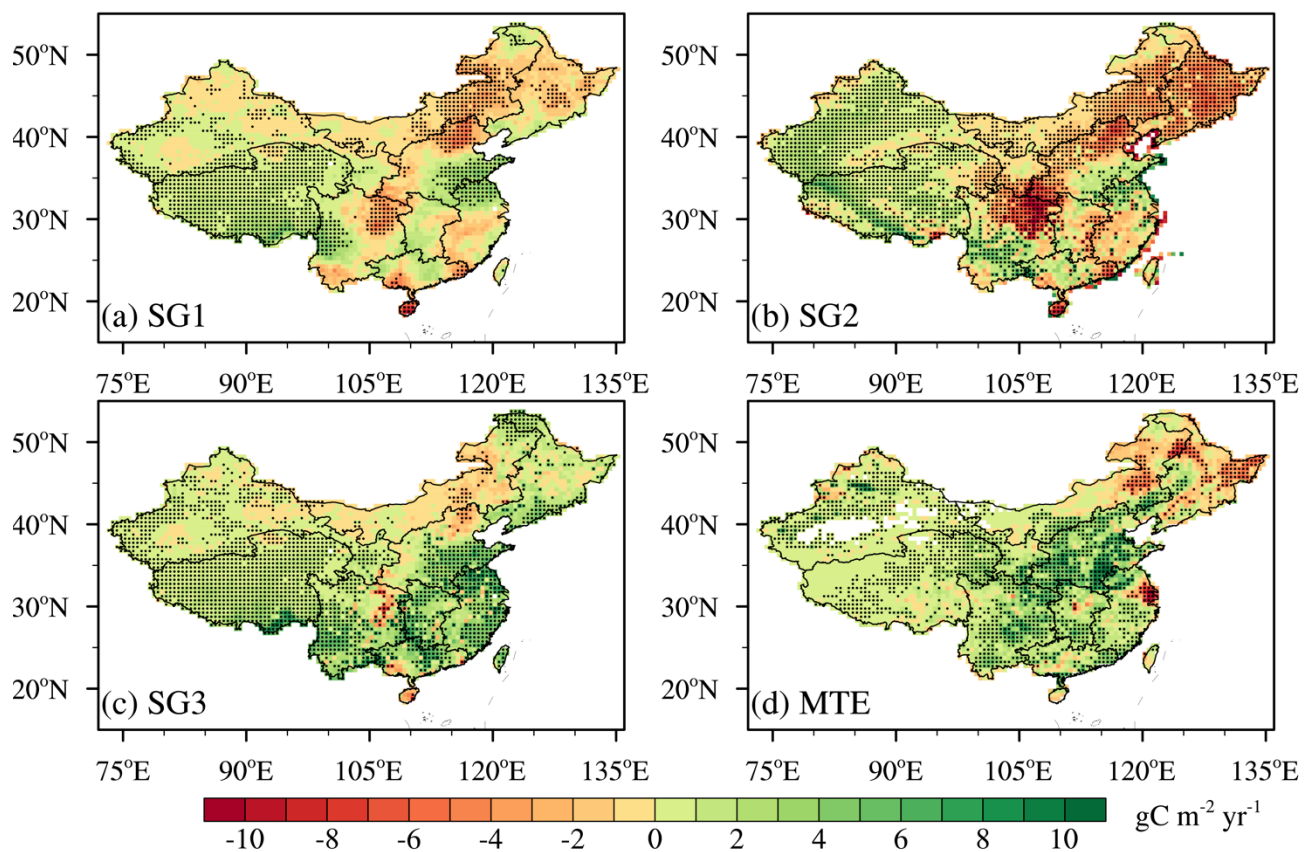

**Figure S2.** Trends in annual GPP between 1982 and 2010 from the ensemble mean of MsTMIP simulations: (a) SG1, (b) SG2, (c) SG3 and (d) MTE. Stippling highlights regions with significant trend ( $p < 0.05$ ).

## References

- Ahlström, A., Raupach, M., Schurgers, G., Smith, B., Arneth, A., Jung, M., Reichstein, M., Canadell, J., Friedlingstein, P., Jain, A., Kato, E., Poulter, B., Sitch, S., Stocker, B., Viovy, N., Wang, Y., Wiltshire, A., Zaehle, S., and Zeng, N.: The dominant role of semi-arid ecosystems in the trend and  
5 variability of the land CO<sub>2</sub> sink, *Science*, 348(6237), 895–899, 2015.
- Baker, I. T., Prihodko, L., Denning, A. S., Goulden, M., Miller, S. and da Rocha, H. R.: Seasonal drought stress in the Amazon: reconciling models and observations, *J. Geophys. Res.*, 113, G00B01, doi: 10.1029/2007JG000644, 2008.
- Chen, M., Rafique, R., Asrar, G. R., Bond-Lamberty, B., Ciais, P., Zhao, F., Reyer, C. P. O., Ostberg,  
10 S., Chang, J., Ito, A., Yang, J., Zeng, N., Kalnay, E., West, T., Leng, G., Francois, L., Munhoven, G., Henrot, A., Tian, H., Pan, S., Nishina, K., Viovy, N., Morfopoulos, C., Betts, R., Schaphoff, S., Steinkamp, J., and Hickler, T.: Regional contribution to variability and trends of global gross primary productivity, *Environ. Res. Lett.*, 12, 105005, 2017.
- Hayes, D. J., McGuire, A. D., Kicklighter, D. W., Gurney, K. R., Burnside, T. J. and Melillo, J. M.: Is  
15 the northern high-latitude land-based CO<sub>2</sub> sink weakening? *Global Biogeochem. Cycles*, 25, GB3018, doi: 10.1029/2010GB003813, 2011.
- Huntzinger, D. N., Schwalm, C., Michalak, A. M., Schaefer, K., King, A. W., Wei, Y., Jacobson, A., Liu, S., Cook, R. B., Post, W. M., Berthier, G., Hayes, D., Huang, M., Ito, A., Lei, H., Lu, C., Mao, J., Peng, C. H., Peng, S., Poulter, B., Ricciuto, D., Shi, X., Tian, H., Wang, W., Zeng, N., Zhao, F.,  
20 and Zhu, Q.: The North American Carbon Program Multi-scale Synthesis and Terrestrial Model Intercomparison Project: Part 1: overview and experimental design, *Geosci. Model Dev.* 6, 2121–2133, 2013.
- Hurt, G. C., Chini, L., Frolking, S., Betts, R., Edmonds, J., Feddema, J., Fisher, G., Goldewijk, K. K., Hibbard, K., Houghton, R., Janetos, A., Jones, C., Kinderman, G., Konoshita, T., Riahi, K.,  
25 Shevliakova, E., Smith, S. J., Stefest, E., Thomson, A. M., Thornton, P., van Vuuren, D., and Wang, Y.: Harmonization of land-use scenarios for the period 1500–2100: 600 years of global gridded annual land-use transitions, wood harvest, and resulting secondary lands, *Clim. Change*, 109, 117–161, doi:10.1007/s10584-011-0153-2, 2011.
- Ito, A., and Inatomi, M.: Water-use efficiency of the terrestrial biosphere: A model analysis focusing  
30 on interactions between the global carbon and water cycles, *J. Hydrometeorol.*, 13(2), 681–694, 2012.
- Jain, A. K., Meiyappan, P., Song, Y., and House, J.: CO<sub>2</sub> emissions from land-use change affected more by nitrogen cycle, than by the choice of land-cover data, *Global Change Biol.*, 19, 2893–2906, doi: 10.1111/gcb.12207, 2013.

- Jung, M., Henkel, K., Herold, M., and Churkina, G.: Exploiting synergies of global land cover products for carbon cycle modeling, *Remote Sens. Environ.*, 101, 534–553, doi:10.1016/j.rse.2006.01.020, 2006.
- Krinner, G., Viovy, N., de Noblet-Ducoudré, N., Ogée, J., Polcher, J., Friedlingstein, P., Ciais, P.,  
5 Sitch, S., and Prentice, I. C.: A dynamic global vegetation model for studies of the coupled atmosphere-biosphere system, *Global Biogeochem. Cycles*, 19, GB1015, doi: 10.1029/2003GB002199, 2005.
- Lei, H., Huang, M., Leung, L. R., Yang, D., Shi, X. Mao, J., Hayes, D. H., Schwalm, C. R., Wei, Y., and Liu, S.: Sensitivity of global terrestrial gross primary production to hydrologic states simulated by the community land model using two runoff parameterizations, *J. Adv. Model Earth Syst.*, 6, 658–679,  
10 2014.
- Mao, J., Thornton, P. E., Shi, X., Zhao, M. and Post, W. M.: Remote sensing evaluation of CLM4 GPP for the period 2000–09, *J. Clim.*, 25, 5327–5342, doi:10.1175/JCLI-D-11-00401.1, 2012.
- Piao, S., Fang, J., Ciais, P., Peylin, P., Huang, Y., Sitch, S., and Wang, T.: The carbon balance of terrestrial ecosystems in China, *Nature*, 458, 1009–1013, 2009.
- 15 Ricciuto, D. M., King, A. W., Dragoni, D. and Post, W. M.: Parameter and prediction uncertainty in an optimized terrestrial carbon cycle model: effects of constraining variables and data record length, *J. Geophys. Res.*, 116, G01033. doi: 10.1029/2010JG001400, 2011.
- Schaefer, K., Collatz, G. J., Tans, P., Denning, A. S., Baker, I., Berry, J., Prihodko, L., Suits, N., and Philpott, A.: Combined Simple Biosphere/Carnegie-Ames-Stanford Approach terrestrial carbon cycle  
20 model, *J. Geophys. Res.*, 113, G03034, doi: 10.1029/2007JG000603, 2008.
- Sen, P. K.: Estimates of the regression coefficient based on Kendall’s tau, *J. Amer. Stat. Assoc.*, 63, 1379–1389, 1968.
- Shi, X., Mao, J., Thornton, P. E., Hoffman, F. M. and Post, W. M.: The impact of climate, CO<sub>2</sub>, nitrogen deposition and land use change on simulated contemporary global river flow, *Geophys. Res. Lett.*, 38, L08704. doi: 10.1029/2011GL046773, 2011.  
25
- Sitch, S., Smith, B., Prentice, I. C., Arneth, A., Bondeau, A., Cramer, W., Kaplans, J. O., Levis, S., Lucht, W., Sykes, M. T., Thonicke, K., and Venevsky, S.: Evaluation of ecosystem dynamics, plant geography and terrestrial carbon cycling in the LPJ dynamic global vegetation model, *Global Change Biol.*, 9, 161–185, 2003.
- 30 Tian, H., Chen, G., Zhang, C., Liu, M., Sun, G., Chappelka, A., Ren, W., Xu, X., Lu, C., Pan, S., Chen, H., Hui, D., McNulty, S., Lockaby, G., and Vance, E.: Century-scale responses of ecosystem carbon storage and flux to multiple environmental changes in the southern United States, *Ecosystems*, 15, 674–694, 2012.

- Tian, H., Xu, X., Lu, C., Liu, M., Ren, W., Chen, G., Melillo, J., and Liu, J.: Net exchanges of CO<sub>2</sub>, CH<sub>4</sub>, and N<sub>2</sub>O between China's terrestrial ecosystems and the atmosphere and their contributions to global climate warming, *J. Geophys. Res.* 116, G02011, doi: 10.1029/2010JG001393, 2011.
- Wei, Y., Liu, S., Huntzinger, D. N., Michalak, A. M., Viovy, N., Post, W. M., Schwalm, C. R.,  
5 Schaefer, K., Jacobson, A., Lu, C., Tian, H., Ricciuto, D., Cook, R. B., Mao, J., and Shi, X.: The North American Carbon Program Multi-scale Synthesis and Terrestrial Model Intercomparison Project—Part 2: Environmental driver data, *Geosci. Model Dev.* 7, 2875–2893, 2014a.
- Wei, Y., Liu, S., Huntzinger, D. N., Michalak, A. M., Viovy, N., Post, W. M., Schwalm, C. R.,  
Schaefer, K., Jacobson, A. R., Lu, C., Tian, H., Ricciuto, D.M., Cook, R.B., Mao, J., and Shi, X.:  
10 NACP MsTMIP: Global and North American Driver Data for Multi-Model Intercomparison, ORNL DAAC, Oak Ridge, Tennessee, USA. <https://doi.org/10.3334/ORNLDAAAC/1220>, 2014b.
- Zeng, N., Mariotti, A. and Wetzal, P.: Terrestrial mechanisms of interannual CO<sub>2</sub> variability, *Global Biogeochem. Cycles*, 19, GB1016, doi: 10.1029/2004GB002273, 2005.
